# Supplementary material
Source: PubMed Central journal article supplement (PMC3652581)
Supplement: NIHMS464295-supplement-supplementary_material.pdf [file NIHMS464295-supplement-supplementary_material.pdf]

## **SUPPLEMENTARY INFORMATION**

### **MATERIALS AND METHODS**

#### **Colony-formation assay**

Soft agar assay for colony formation was performed following the standard protocol (Invitrogen). ARP-1 cells (1,250 cells per well) or MΦs (1,250 cells per well) or their combinations were seeded in 24-well plates for the assay.

#### **Cell proliferation assay**

Cell proliferation was measured by MTS assay following the manufacturer's protocol (Promega).

### **SUPPLEMENTARY FIGURE LEGENDS**

**Supplementary Figure 1. Identification of differentially regulated and paired membrane protein genes.** Graphic workflow of identification of differentially regulated and paired membrane protein genes from cultured MM cells and MΦs.

**Supplementary Figure 2. Selectins and PSGL-1 in MΦ-mediated MM drug resistance.** (A) RT-PCR for E- and P-selectin expression in monocyte-derived MΦs from three different blood donors. (B) Flow cytometry analysis and (C) western blotting showing PSGL-1 expression on and in wild-type (control), control transduced, or PSGL-1 shRNA-transduced MM cells (ARP-1 or ARK).

**Supplementary Figure 3. Roles of CD18 and ICAM-1 in MΦ-mediated MM drug resistance.** (A) Flow cytometry analysis and (B) western blotting showing ICAM-1 expression on ICAM-1 shRNA-transduced MM cells (CAG or U266). Controls include wild-type (control) and control shRNA-transduced (control shRNA) MM cells (CAG or U266).

**Supplementary Figure 4. Activation of signaling pathways in MM cells under coculture conditions.** Western blotting analyses showing (A) the expression of PSGL-1, c-myc, pSrc(Y416), Src, pErk1/2, and Erk1/2 in MM.1S and CAG cells; (B) expression or (C) semi-quantifies amounts (the band intensity was analyzed by ImageJ and normalized to  $\beta$ -actin) of the expression of PSGL-1, c-myc, pErk1/2(T202/204), Erk1/2 and actin in PSGL-1-knocked down ARK cells (PSGL-1 KD) alone or after coculture with M $\Phi$ s for 24 hours. Wild-type (con) and control shRNA-transfected (con KD) ARK were used as controls; (D) PSGL-1 expression in ARP-1 cells in cultures of MM cells alone (Al) or in coculture with M $\Phi$ s in transwell (Tr) or in direct contact (Co) for 24 hours in the presence or absence of IFN- $\alpha$ -blocking antibody (10  $\mu$ g/ml) or control IgG. (E) Percentage of melphalan-induced apoptotic ARP-1 cells in culture alone or in direct coculture with M $\Phi$ s in the presence or absence (control) of 10  $\mu$ g/ml of IFN- $\alpha$ -blocking antibody or control IgG. Summarized results from three independent experiments are shown. \* $P < 0.05$ .

**Supplementary Figure 5. In vivo and in vitro effects of M $\Phi$ s on MM cell growth/proliferation and tumorigenicity.** (A) Tumor volume in SCID mice inoculated with ARP-1 alone or ARP-1 together with human monocytes without treatments. \* $P < 0.05$ , \*\* $P < 0.01$ . (B) In vitro ARP-1 cell proliferation measured by MTS assay, (C) colony formation in culture of ARP-1 alone or in direct coculture with M $\Phi$ s. Representative results from three independent experiments. \* $P < 0.05$ , \*\* $P < 0.01$ .

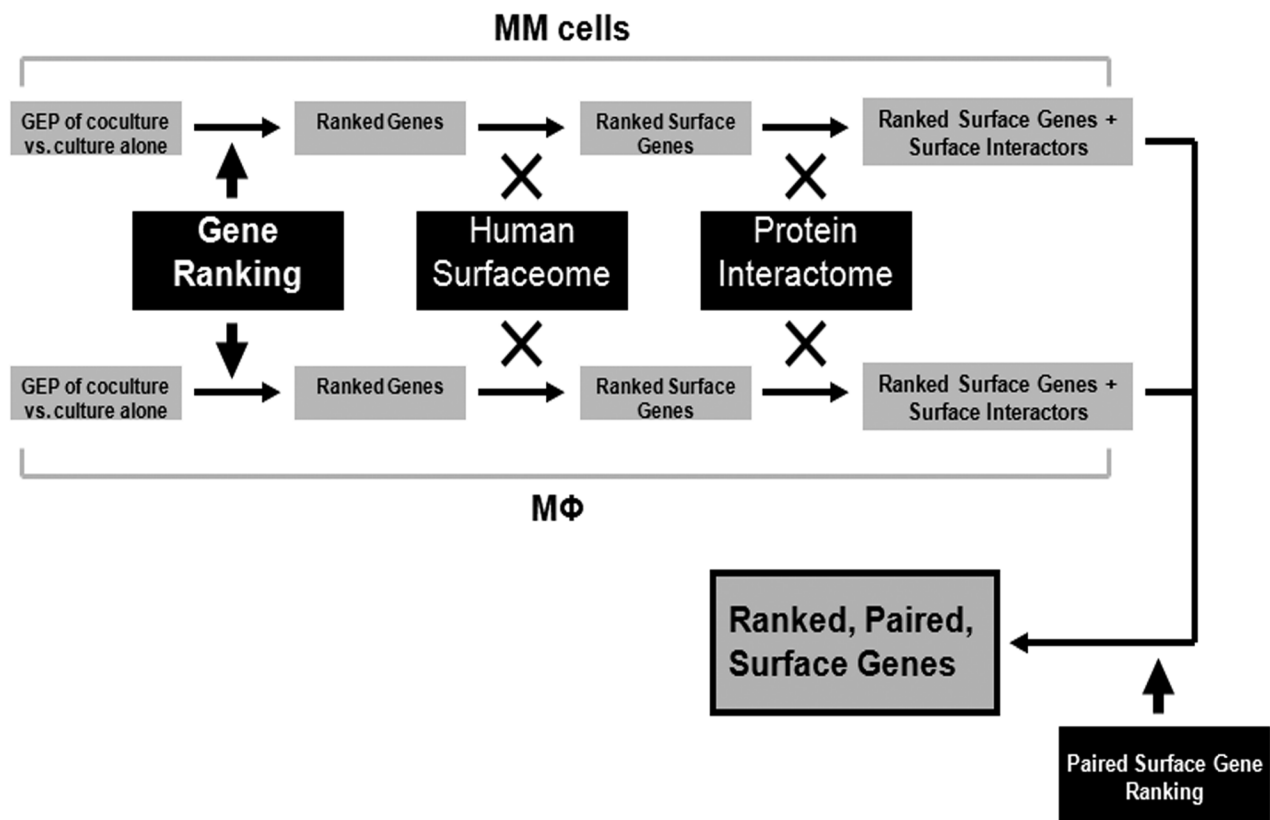

Supplementary Figure 1

**A**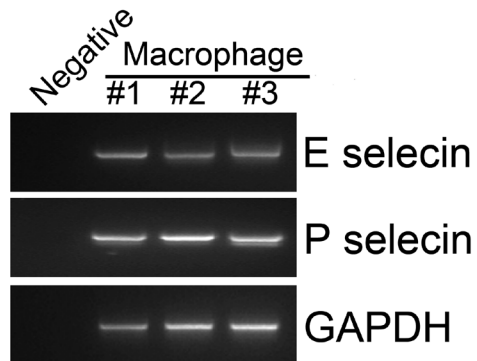**B**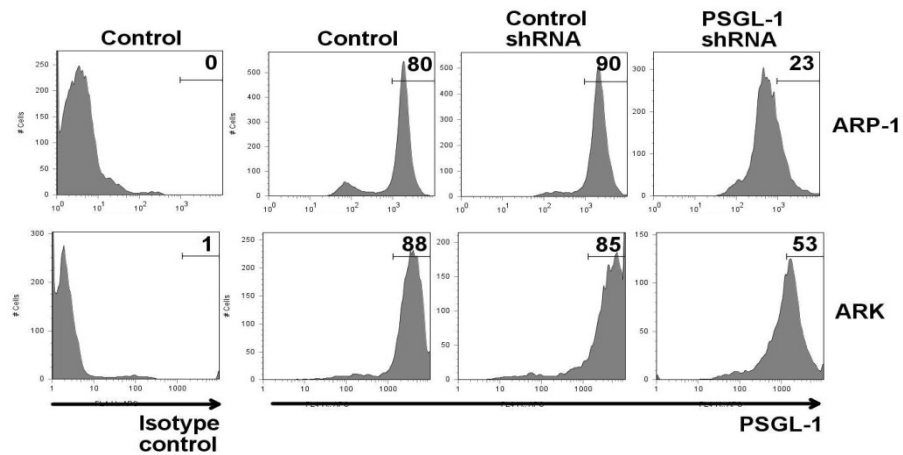**C**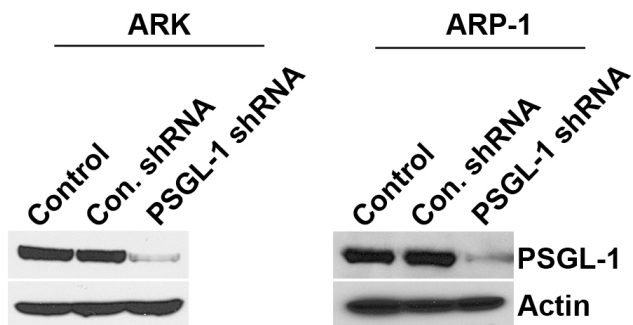

Supplementary Figure 2

**A**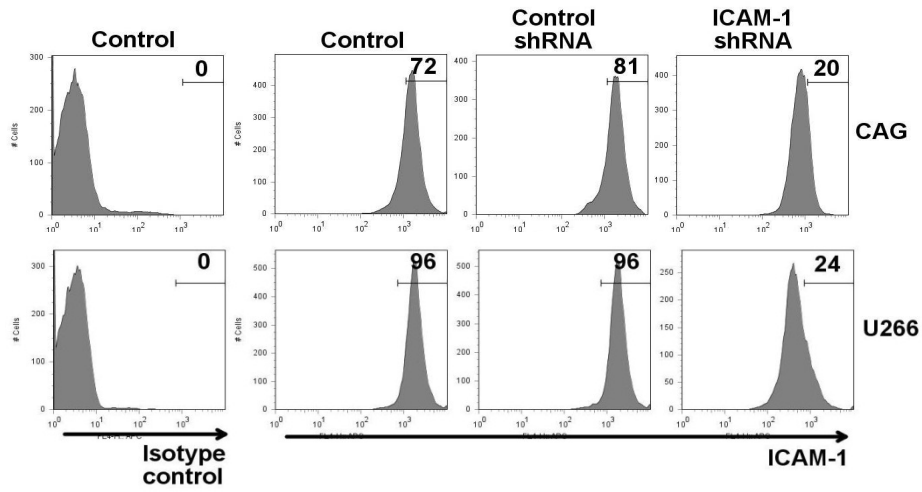**B**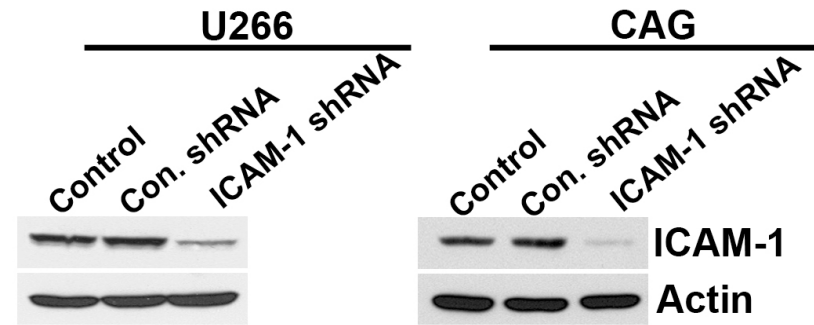**Supplementary Figure 3**

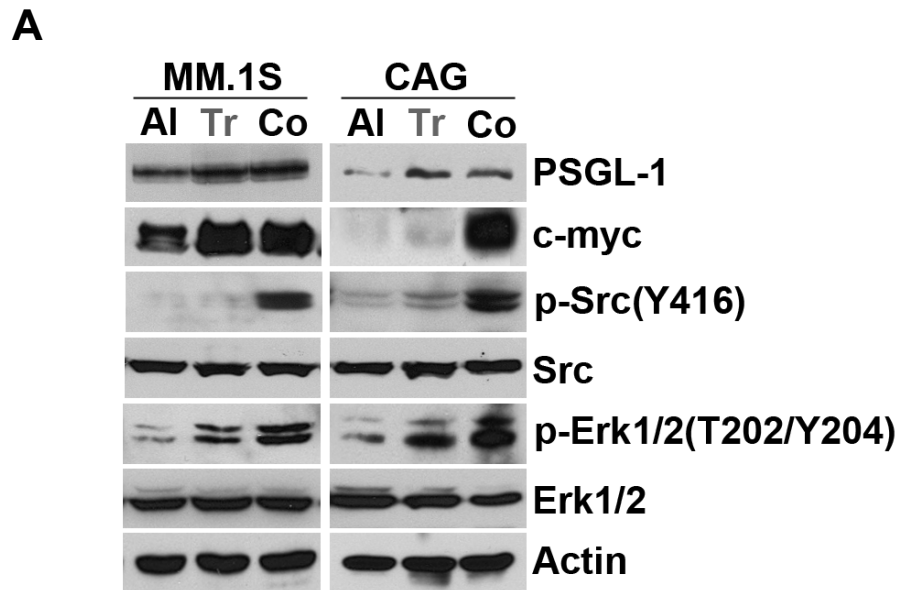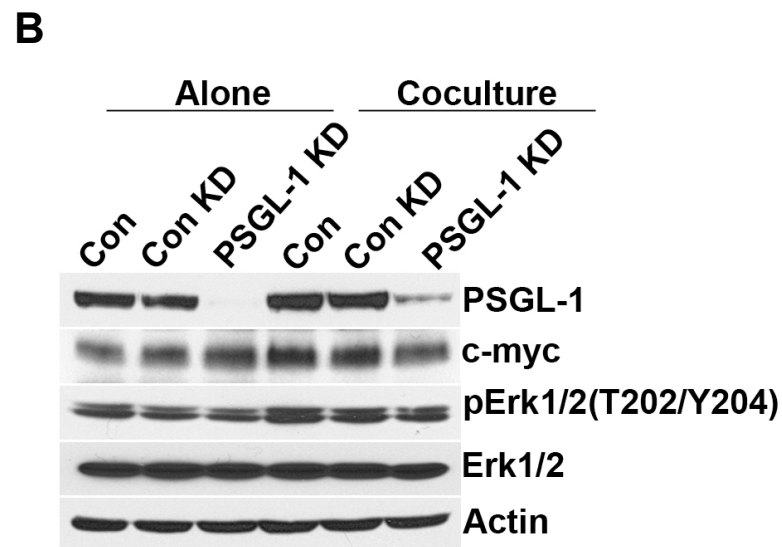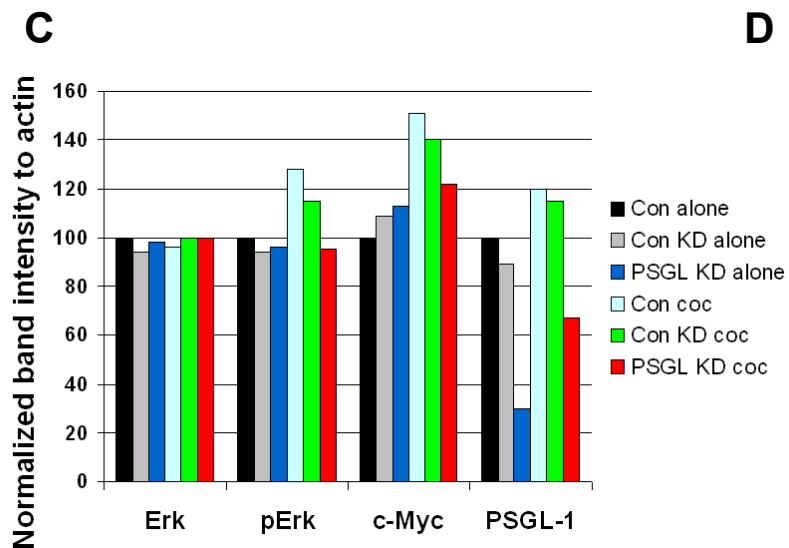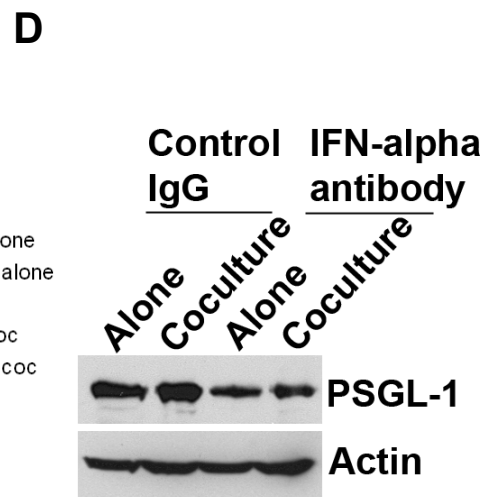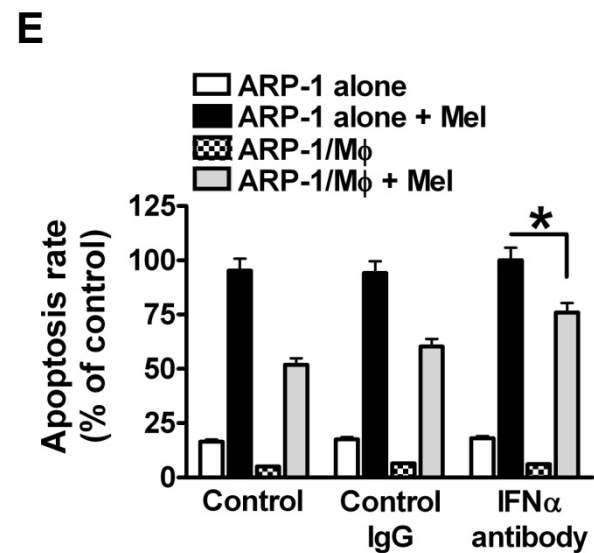

Supplementary Figure 4

**A**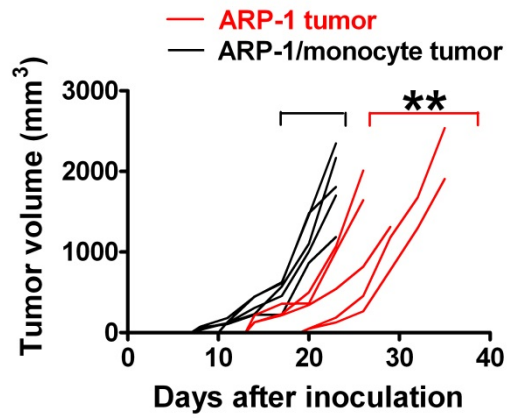**B**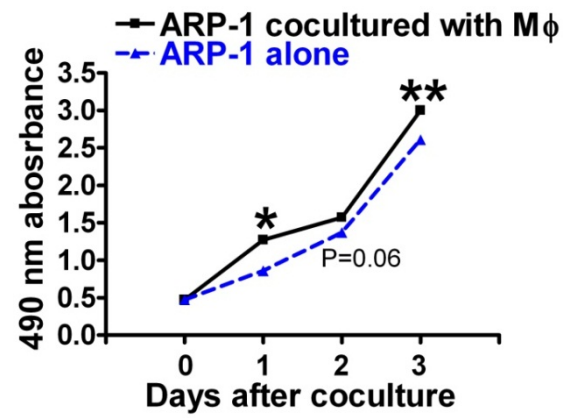**C**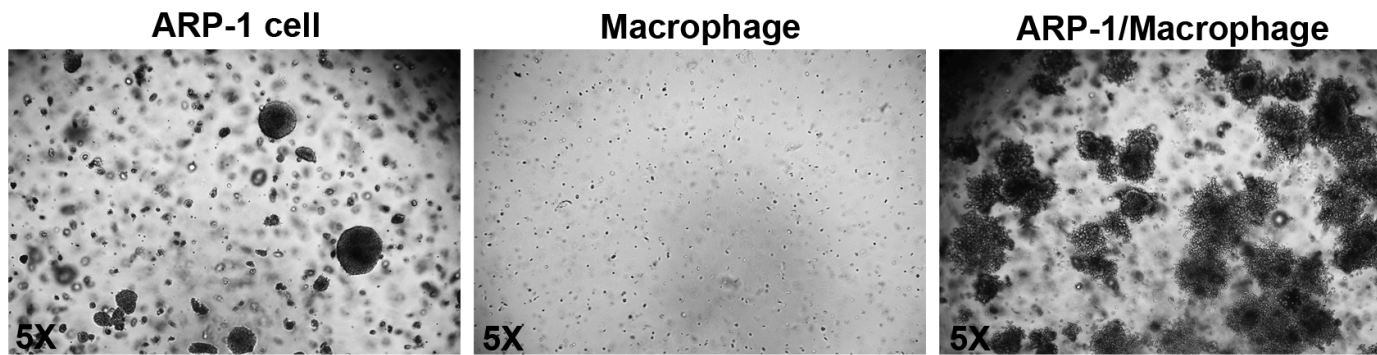

Supplementary Figure 5

## SUPPLEMENTARY TABLE LEGEND

**Supplementary Table 1.** A representative subset of top 250 paired surface protein genes.

Same genes on myeloma cells are combined and alphabetically sorted. Self-interacting gene pairs are removed.

| <b>Myeloma surface protein</b> | <b>Macrophage surface protein</b> |
|--------------------------------|-----------------------------------|
| CAV1                           | PTPRF                             |
|                                | S1PR1                             |
|                                | INSR                              |
|                                | CAV2                              |
|                                | KDR                               |
|                                | GJA1                              |
|                                | HTR1F                             |
|                                | EDNRB                             |
|                                | PRNP                              |
|                                | MMP14                             |
|                                | APP                               |
|                                | CD40                              |
|                                | CD200                             |
| CD74                           | HLA-DPB1                          |
|                                | CD1D                              |
|                                | HLA-DQA1                          |
|                                | HLA-DQB1                          |
|                                | HLA-DPA1                          |
|                                | HLA-DRA                           |
|                                | HLA-DMB                           |
|                                | HLA-DMA                           |
| FGFR1                          | FLRT3                             |
|                                | NCAM1                             |
|                                | EPHA4                             |
| ICAM3                          | CLEC4M                            |
| ICAM4                          | ITGB1                             |
| NCAM1                          | PRNP                              |
| NOTCH2                         | PSEN1                             |
|                                | DLL1                              |
|                                | JAG2                              |
| PECAM1                         | EFNB2                             |
|                                | ITGB3                             |
| SELPLG                         | SELE                              |
| VCAM1                          | ITGB1                             |
|                                | ITGB7                             |
